# Supplementary material
Source: PubMed Central journal article supplement (PMC3477237)
Supplement: NIHMS159011-supplement-1_si_001.pdf [file NIHMS159011-supplement-1_si_001.pdf]

## Evidence of Diketopiperazine and Oxazolone Structures for HA $b_2^+$ Ion

Brittany R. Perkins,<sup>§</sup> Julia Chamot-Rooke,<sup>†</sup> Sung Hwan Yoon,<sup>§</sup>

Ashley C. Gucinski,<sup>§</sup> Árpád Somogyi,<sup>§</sup> Vicki H. Wysocki<sup>†,§</sup>

<sup>§</sup>Department of Chemistry and Biochemistry, University of Arizona, Tucson, Arizona, 85721, <sup>†</sup>Laboratoire des Mécanismes Réactionnels, Department of Chemistry, Ecole Polytechnique, CNRS, 91128 Palaiseau, France

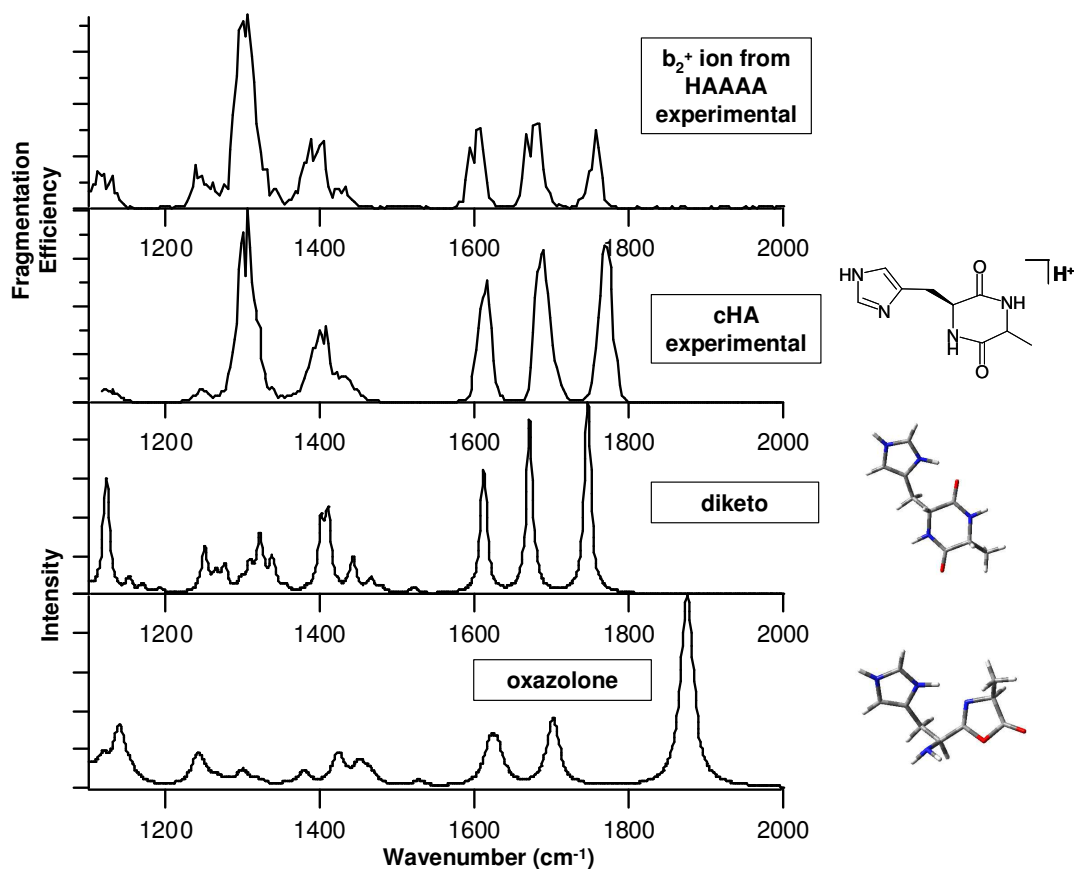

Figure S1: FT-IRMPD action spectra of a) the  $b_2^+$  ion produced by QCID fragmentation of protonated  $HA_4$  and b) the protonated cyclic dipeptide  $HA$  plotted as fragmentation efficiency for formation of the fragment ions vs wavenumber. Calculated spectra for c) diketopiperazine and d) oxazolone structures. Because the percent conversion of precursor to fragments was kept low in these experiments and the overlap of the ion cloud with the laser beam is poorer, the oxazolone peak at  $1875\text{ cm}^{-1}$  that is seen in the ion trap (Figure 1) was not detected.

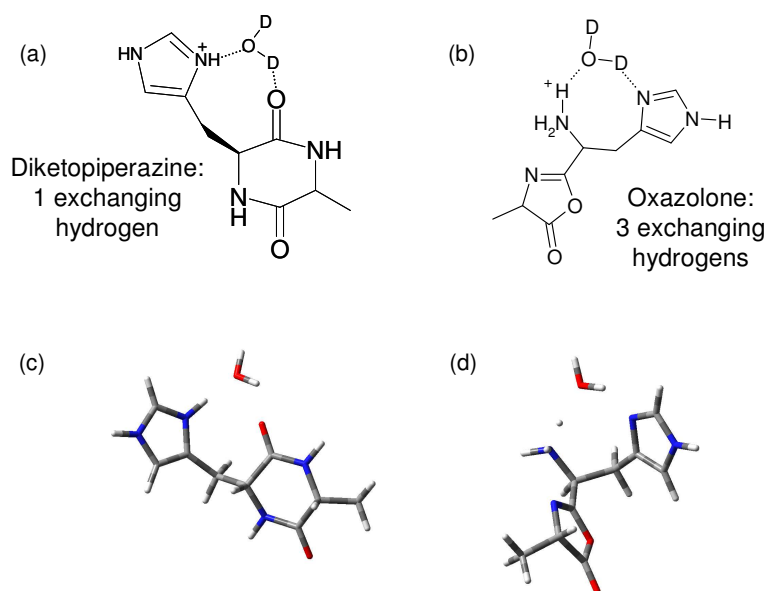

FIGURE S2: Relay mechanism for a) diketopiperazine and b) oxazolone with corresponding optimized structures. (c,d)

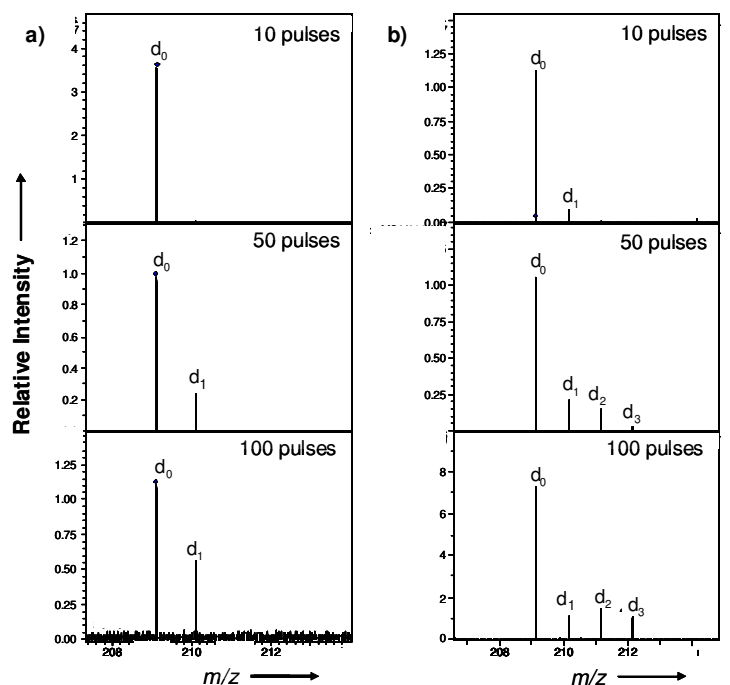

Figure S3: H/D exchange of a) protonated cyclo-His-Ala, produced in the ion source, and b) HA  $b_2^+$  for 10 pulses, 50 pulses, and 100 pulses using a 9.4 T Bruker Apex Qh FT-ICR fitted with a pulse-leak valve. The  $b_2^+$  ions were generated by CID in a hexapole collision cell, transferred to the ICR cell, and exchanged with  $CD_3OD$  for various exchange times.

Figure S3a shows the H/D exchange for the protonated cHA at increasing exchange times with  $CD_3OD$ . As expected, even at extended exchange times (bottom), the cHA diketopiperazine structure has only exchanged one hydrogen. The  $b_2^+$  ion from protonated HA<sub>4</sub> (Figure S3b) shows a population that incorporates up to three deuterium atoms, indicating the presence of the oxazolone and a clear difference from the cHA exchange, but a larger number of pulses of  $CD_3OD$ , would be necessary to unambiguously show the two distinct exchanging populations that are seen in the IonSpec exchange. In the current HDX setup the deuteration agent ( $CD_3OD$ ) is introduced by a pulsed valve to the ICR cell. The pulse length is variable but in the current

experiments 50 ms pulses were used (i.e., this is the time of leaking CD<sub>3</sub>OD into the ICR cell for each pulse). These pulses are separated by 1s during which the pressure does not change significantly and partial pressure of CD<sub>3</sub>OD can be built up by applying multiple pulses (e.g., 10, 50, and 100 as for data shown here). With this instrument configuration the pressure fluctuates slightly but the instrumental conditions can be kept the same from sample to sample. The HDX reactions have been performed sequentially for the projectiles investigated and have been repeated many times to check reproducibility. Because we are using relative HDX kinetics data under the same experimental conditions, we believe that the described method is adequate to recognize the presence or absence of multiple structures in isobaric ion populations.

Table S1. Structures, descriptions, and relative energies (kJ/mol) of  $b_2^+$  ion isomers with diketopiperazine and oxazolone structures. Protonated isomer structure descriptions indicate either pillar hetero atoms that bridge the proton or the protonation site.

|                                                                                     |                                 | $\Delta\Delta H_{298.15}$ | $\Delta\Delta G_{298.15}$ |
|-------------------------------------------------------------------------------------|---------------------------------|---------------------------|---------------------------|
| 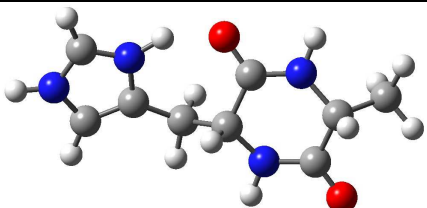   | diketo His $N_\pi - CO_{(His)}$ | 0                         | 0                         |
|    | diketoHis $N_\pi - CO_{(His)}$  | 8.8                       | 11.0                      |
|   | diketoHis $N_\pi - N_{(His)}$   | 34.4                      | 33.9                      |
|  | diketoHis $N_\pi - CO_{(Ala)}$  | 51.5                      | 54.7                      |
|  | diketo $CO_{(Ala)}$             | 100.1                     | 98.0                      |

|                                                                                     |                                                    |       |       |
|-------------------------------------------------------------------------------------|----------------------------------------------------|-------|-------|
| 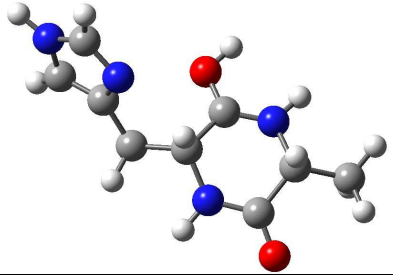   | diketo CO <sub>(His)</sub>                         | 124.0 | 119.5 |
|    | oxaz His N <sub>π</sub> - ring N <sub>(oxaz)</sub> | 86.2  | 85.4  |
|   | oxaz His N <sub>π</sub> - N <sub>(amino)</sub>     | 87.6  | 87.7  |
|  | oxaz His N <sub>π</sub> - N <sub>(amino)</sub>     | 88.7  | 87.9  |
|  | oxaz His N <sub>π</sub> - ring N <sub>(oxaz)</sub> | 94.8  | 93.7  |
|  | oxaz His N <sub>π</sub> - ring O <sub>(oxaz)</sub> | 101.6 | 99.2  |

## Full References

- (1) (a) Yalcin, T.; Khouw, C.; Csizmadia, I. G.; Peterson, M. R.; Harrison, A. G. *Journal of the American Society for Mass Spectrometry* **1995**, *6*, 1165-1174. (b) Nold, M. J.; Wesdemiotis, C.; Yalcin, T.; Harrison, A. G. *International Journal of Mass Spectrometry and Ion Processes* **1997**, *164*, 137-153. (c) Vaisar, T.; Urban, J. *European Mass Spectrometry* **1998**, *4*, 359-364. (d) Haselmann, K. F.; Budnik, B. A.; Zubarev, R. A. *Rapid Communications in Mass Spectrometry* **2000**, *14*, 2242-2246. (e) Paizs, B.; Suhai, S.; Hargittai, B.; Hruby, V.; Somogyi, A. *International Journal of Mass Spectrometry* **2002**, *219*, 203-232. (f) Riba-Garcia, I.; Giles, K.; Bateman, R. H.; Gaskell, S. J. *Journal of the American Society for Mass Spectrometry* **2008**, *19*, 609-613.
- (3) (a) Eckart, K.; Holthausen, M. C.; Koch, W.; Spiess, J. *Journal of the American Society for Mass Spectrometry* **1998**, *9*, 1002-1011. (b) Harrison, A. G.; Csizmadia, I. G.; Tang, T. H. *Journal of the American Society for Mass Spectrometry* **2000**, *11*, 427-436. (c) Paizs, B.; Suhai, S. *Rapid Communications in Mass Spectrometry* **2002**, *16*, 375-389. (d) Paizs, B.; Suhai, S. *Journal of the American Society for Mass Spectrometry* **2003**, *14*, 1454-1469. (e) El Aribi, H.; Rodriguez, C. F.; Almeida, D. R. P.; Ling, Y.; Mak, W. W. N.; Hopkinson, A. C.; Siu, K. W. M. *Journal of the American Chemical Society* **2003**, *125*, 9229-9236. (f) El Aribi, H.; Orlova, G.; Rodriguez, C. F.; Almeida, D. R. P.; Hopkinson, A. C.; Siu, K. W. M. *Journal of Physical Chemistry B* **2004**, *108*, 18743-18749. (g) Bythell, B. J.; Barofsky, D. F.; Pingitore, F.; Polce, M. J.; Wang, P.; Wesdemiotis, C.; Paizs, B. *Journal of the American Society for Mass Spectrometry* **2007**, *18*, 1291-1303.
- (6) (a) Somogyi, A. *J. Am. Soc. Mass Spectrom.* **2008**, *19*, 1771-1775. (b) Sawyer, H. A.; Marini, J. T.; Stone, E. G.; Ruotolo, B. T.; Gillig, K. J.; Russell, D. H. *J. Am. Soc. Mass Spectrom.* **2005**, *16*, 893-905. (c) Polfer, N. C.; Oomens, J. *Phys. Chem. Chem. Phys.* **2007**, *9*, 3804-3817.
- (8) (a) Yoon, S. H.; Chamot-Rooke, J.; Perkins, B. R.; Hilderbrand, A. E.; Poutsma, J. C.; Wysocki, V. H. *J. Am. Chem. Soc.* **2008**, *130*, 17644-17645. (b) Oomens, J.; Young, S.; Molesworth, S.; van Stipdonk, M. *J. Am. Soc. Mass Spectrom.* **2009**, *20*, 334-339. (c) Bythell, B. J.; Erlekam, U.; Paizs, B.; Maitre, P. *Chem. Phys. Chem.* **2009**, *10*, 883-885.
- (10) Gaussian 03, Revision D.01, M. J. Frisch, G. W. Trucks, H. B. Schlegel, G. E. Scuseria, M. A. Robb, J. R. Cheeseman, J. A. Montgomery, Jr., T. Vreven, K. N. Kudin, J. C. Burant, J. M. Millam, S. S. Iyengar, J. Tomasi, V. Barone, B. Mennucci, M. Cossi, G. Scalmani, N. Rega, G. A. Petersson, H. Nakatsuji, M. Hada, M. Ehara, K. Toyota, R. Fukuda, J. Hasegawa, M. Ishida, T. Nakajima, Y. Honda, O. Kitao, H. Nakai, M. Klene, X. Li, J. E. Knox, H. P. Hratchian, J. B. Cross, V. Bakken, C. Adamo, J. Jaramillo, R. Gomperts, R. E. Stratmann, O. Yazyev, A. J. Austin, R. Cammi, C. Pomelli, J. W. Ochterski, P. Y. Ayala, K. Morokuma, G. A. Voth, P. Salvador, J. J. Dannenberg, V. G. Zakrzewski, S. Dapprich, A. D. Daniels, M. C. Strain, O. Farkas, D. K. Malick, A. D. Rabuck, K. Raghavachari, J. B. Foresman, J. V. Ortiz, Q. Cui, A. G. Baboul, S. Clifford, J. Cioslowski, B. B. Stefanov, G. Liu, A. Liashenko, P. Piskorz, I. Komaromi, R. L. Martin, D. J. Fox, T. Keith, M. A. Al-Laham, C. Y. Peng, A. Nanayakkara, M. Challacombe, P. M. W. Gill, B. Johnson, W. Chen, M. W. Wong, C. Gonzalez, and J. A. Pople, Gaussian, Inc., Wallingford CT, 2004.
